# Supplementary material for: Deconstructing the Dimensions of Mycobiome Fingerprints in Luohandu Cave, Guilin, Southern China
Source: MDPI journal article supplement (doi:10.3390/microorganisms12010211), 2024-01-20
Supplement: s1 [file s1]

# Deconstructing the Dimensions of Mycobiome Fingerprints in Luohandu Cave, Guilin, Southern China

Bai-Ying Man <sup>1,2,\*</sup>, Xing Xiang <sup>1,2</sup>, Xiao-Yu Cheng <sup>3,4</sup>, Hong-Mei Wang<sup>3,4,\*</sup>, Chun-Tian Su <sup>5,6</sup>, Qi-Bo Huang <sup>5,6</sup>, Yang Luo <sup>1,2</sup>, Chao Zhang <sup>1,2</sup>, Gang Cheng <sup>1,2</sup>, Yu-Yang Ni <sup>1,2</sup> and Xing-Hua Shao <sup>1,2</sup>

<sup>1</sup> College of Life Science, Shangrao Normal University, Shangrao, China  
<sup>2</sup> Key Laboratory for Regional Plants Conservation and Ecological Restoration of Northeast Jiangxi, Shangrao Normal University, Shangrao, China; shmilying@126.com (B.-Y.M.), xiangxing1989@126.com (X.X.), 312144@sru.edu.cn (Y.-Y.N.), zhangchao\_20180604@163.com (C.Z.), enjoy123fly@163.com (G.C.), yangl1829848@163.com (Y.L.), xinghuashao@126.com (X.-H.S.)  
<sup>3</sup> School of Environmental Studies, China University of Geosciences, Wuhan, China; chengxy@cug.edu.cn (X.-Y.C.), wanghmei04@163.com (H.-M.W.).  
<sup>4</sup> State Key Laboratory of Geobiology and Environmental Geology, China University of Geosciences, Wuhan, China  
<sup>5</sup> Institute of Karst Geology, CAGS/Key Laboratory of Karst Dynamics, MNR & GZAR, Guilin, China; schuntian@mail.cgs.gov.cn (C.-T.S.), qbohuang0108@163.com (Q.-B.H.).  
<sup>6</sup> Pingguo Guangxi, Karst Ecosystem, National Observation and Research Station, Pingguo, Guangxi, China  
\* Correspondence: shmilying@126.com (B.-Y.M.); wanghmei04@163.com (H.-M.W.)

## Supplementary Materials:

**Tabel S2** Top 10 nodes with the highest betweenness centrality in mycobiome networks of Luohandu cave, southern China

| Weathered rock networks |               |                        | Sediments networks |               |                        |
|-------------------------|---------------|------------------------|--------------------|---------------|------------------------|
| Lable                   | Phylum        | Betweenness centrality | Label              | Phylum        | Betweenness centrality |
| ASV1663                 | Ascomycota    | 124.6                  | ASV7554            | Ascomycota    | 1833.1                 |
| ASV1833                 | Unclassified  | 102.0                  | ASV8525            | Ascomycota    | 1547.1                 |
| ASV8564                 | Ascomycota    | 85.2                   | ASV7543            | Unclassified  | 1503.9                 |
| ASV3404                 | Basidiomycota | 64.0                   | ASV2556            | Basidiomycota | 1329.4                 |
| ASV8545                 | Ascomycota    | 62.6                   | ASV5140            | Ascomycota    | 1279.1                 |
| ASV8485                 | Unclassified  | 56.0                   | ASV3586            | Basidiomycota | 1157.6                 |
| ASV6757                 | Ascomycota    | 51.0                   | ASV6522            | Ascomycota    | 1133.4                 |
| ASV8134                 | Ascomycota    | 46.0                   | ASV2139            | Ascomycota    | 1105.9                 |
| ASV2246                 | Ascomycota    | 43.7                   | ASV8545            | Ascomycota    | 993.6                  |
| ASV6760                 | Ascomycota    | 39.0                   | ASV7572            | Ascomycota    | 928.4                  |

**Table S3** Top 10 nodes with the highest closeness centrality in mycobiome networks of Luohandu cave, southern China

| Weathered rock networks |               |                      | Sediments networks |               |                      |
|-------------------------|---------------|----------------------|--------------------|---------------|----------------------|
| Lable                   | Phylum        | Closeness centrality | Label              | Phylum        | Closeness centrality |
| ASV3504                 | Basidiomycota | 1.00                 | ASV191             | Ascomycota    | 1.00                 |
| ASV3510                 | Basidiomycota | 1.00                 | ASV2405            | Ascomycota    | 1.00                 |
| ASV4048                 | Basidiomycota | 1.00                 | ASV4220            | Basidiomycota | 1.00                 |
| ASV4300                 | Basidiomycota | 1.00                 | ASV6403            | Ascomycota    | 1.00                 |
| ASV6290                 | Unclassified  | 1.00                 | ASV6745            | Ascomycota    | 1.00                 |
| ASV6452                 | Ascomycota    | 1.00                 | ASV6814            | Ascomycota    | 1.00                 |
| ASV8494                 | Unclassified  | 1.00                 | ASV6687            | Unclassified  | 0.67                 |
| ASV1253                 | Ascomycota    | 0.63                 | ASV6760            | Ascomycota    | 0.67                 |
| ASV1258                 | Ascomycota    | 0.63                 | ASV6922            | Ascomycota    | 0.45                 |
| ASV8545                 | Ascomycota    | 0.54                 | ASV898             | Ascomycota    | 0.45                 |

**Table S4** Keystone species identified from mycobiome networks of Luohandu cave, southern China

| Samples         | Label   | Phylum        | Relative abundance (%) | Degree | Closeness centrality | Betweenness centrality |
|-----------------|---------|---------------|------------------------|--------|----------------------|------------------------|
| Weathered rocks | ASV4327 | Basidiomycota | 0.53                   | 5      | 0.392                | 7.17                   |
|                 | ASV4703 | Basidiomycota | 0.14                   | 6      | 0.426                | 13.00                  |
|                 | ASV8527 | Ascomycota    | 0.17                   | 5      | 0.403                | 0                      |
|                 | ASV8540 | Ascomycota    | 0.35                   | 8      | 0.455                | 15.10                  |
|                 | ASV8544 | Ascomycota    | 1.29                   | 8      | 0.455                | 4.80                   |
|                 | ASV8563 | Ascomycota    | 0.49                   | 6      | 0.424                | 0                      |
| Sediments       | ASV375  | Ascomycota    | 0.06                   | 40     | 0.374                | 10.90                  |
|                 | ASV2107 | Ascomycota    | 0.05                   | 29     | 0.364                | 12.00                  |
|                 | ASV4438 | Unclassified  | 0.09                   | 35     | 0.377                | 10.70                  |
|                 | ASV4455 | Unclassified  | 0.25                   | 40     | 0.373                | 5.41                   |
|                 | ASV4917 | Ascomycota    | 0.06                   | 33     | 0.370                | 1.27                   |
|                 | ASV6188 | Unclassified  | 0.08                   | 37     | 0.353                | 2.35                   |
|                 | ASV7751 | Ascomycota    | 0.08                   | 26     | 0.360                | 5.08                   |
|                 | ASV7979 | Ascomycota    | 0.07                   | 17     | 0.359                | 5.88                   |
